# Supplementary material for: External validation of the UK Prospective Diabetes Study (UKPDS) risk engine in patients with type 2 diabetes
Source: PubMed Central journal article supplement — Diabetologia. 2010 Nov 14;54(2):264–70. doi: 10.1007/s00125-010-1960-0 (PMC3017299; doi:10.1007/s00125-010-1960-0), 2010-11-14
Supplement: 125_2010_1960_MOESM1_ESM.pdf [file 125_2010_1960_MOESM1_ESM.pdf]

## Electronic supplementary material

### Model description: UKPDS risk engine

$$R(t) = 1 - \exp[-qd^T(\{1-d^t\}/\{1-d\})]$$

Where  $R$  = predicted risk,  $t$  = calculated risk years,  $T$  = duration since diagnosis of diabetes

Linear predictor:

$$q = q_0 \beta_1^{\text{age}-55} \beta_2^{\text{sex}} \beta_3^{\text{ac}} \beta_4^{\text{smoke}} \beta_5^{\text{HbA1c}-6.72} \beta_6^{(\text{SBP}-135.7)/10} \beta_7^{\ln(\text{LR})-1.59}$$
