# Supplementary material for: External validation of the UK Prospective Diabetes Study (UKPDS) risk engine in patients with type 2 diabetes
Source: PubMed Central journal article supplement — Diabetologia. 2010 Nov 14;54(2):264–70. doi: 10.1007/s00125-010-1960-0 (PMC3017299; doi:10.1007/s00125-010-1960-0), 2010-11-14
Supplement: 125_2010_1960_MOESM2_ESM.pdf [file 125_2010_1960_MOESM2_ESM.pdf]

## Electronic supplementary material

**ESM Table 1** Estimates used in the UKPDS model

| <b>Variable</b>                               | <b>Estimates for<br/>the model</b> |
|-----------------------------------------------|------------------------------------|
| Intercept ( $q_0$ )                           | 0.0112                             |
| Age ( $\beta_1$ )                             | 1.059                              |
| Sex ( $\beta_2$ )                             | 0.525                              |
| Ethnicity ('ac') ( $\beta_3$ )                | 0.390                              |
| Smoking ('smoke') ( $\beta_4$ )               | 1.350                              |
| HbA <sub>1c</sub> ( $\beta_5$ )               | 1.144                              |
| Systolic blood pressure ('SBP') ( $\beta_6$ ) | 1.073                              |
| Lipid ratio ('LR') ( $\beta_7$ )              | 3.11                               |
| Duration of diabetes ( $d$ )                  | 1.078                              |
