# Supplementary material for: External validation of the UK Prospective Diabetes Study (UKPDS) risk engine in patients with type 2 diabetes
Source: PubMed Central journal article supplement — Diabetologia. 2010 Nov 14;54(2):264–70. doi: 10.1007/s00125-010-1960-0 (PMC3017299; doi:10.1007/s00125-010-1960-0), 2010-11-14
Supplement: 125_2010_1960_MOESM3_ESM.pdf [file 125_2010_1960_MOESM3_ESM.pdf]

## Electronic supplementary material

**ESM Table 2** Discrimination and calibration of the UKPDS risk engine for calculated risk periods of 4, 5, 6 and 8 years with CHD as outcome for the patient group with diagnosed diabetes for up to 10 years

| Calculated risk period (years) | First analysis  |                              |                                       | Second analysis |                              |                                       |
|--------------------------------|-----------------|------------------------------|---------------------------------------|-----------------|------------------------------|---------------------------------------|
|                                | Cases/ <i>n</i> | <i>c</i> -statistic (95% CI) | $\chi^2$ statistic ( <i>p</i> <0.001) | Cases/ <i>n</i> | <i>c</i> -statistic (95% CI) | $\chi^2$ statistic ( <i>p</i> <0.001) |
| 4                              | 30/1,093        | 0.64 (0.45–0.85)             | 33.2 ( <i>p</i> <0.001)               | 30/1,170        | 0.64 (0.44–0.84)             | 37.9 ( <i>p</i> <0.001)               |
| 5                              | 30/1,066        | 0.66 (0.48–0.84)             | 46.6 ( <i>p</i> <0.001)               | 33/1,170        | 0.65 (0.47–0.84)             | 56.0 ( <i>p</i> <0.001)               |
| 6                              | 36/1,037        | 0.66 (0.48–0.83)             | 60.6 ( <i>p</i> <0.001)               | 36/1,170        | 0.65 (0.47–0.83)             | 77.2 ( <i>p</i> <0.001)               |
| 8                              | 49/802          | 0.65 (0.50–0.80)             | 56.5 ( <i>p</i> <0.001)               | 49/1,170        | 0.64 (0.49–0.79)             | 118.8 ( <i>p</i> <0.001)              |

First analysis: censored cases excluded

Second analysis: censored cases included
