# Supplementary material for: External validation of the UK Prospective Diabetes Study (UKPDS) risk engine in patients with type 2 diabetes
Source: PubMed Central journal article supplement — Diabetologia. 2010 Nov 14;54(2):264–70. doi: 10.1007/s00125-010-1960-0 (PMC3017299; doi:10.1007/s00125-010-1960-0), 2010-11-14
Supplement: 125_2010_1960_MOESM4_ESM.pdf [file 125_2010_1960_MOESM4_ESM.pdf]

## Electronic supplementary material

**ESM Table 3** Discrimination and calibration of the UKPDS risk engine for calculated risk periods of 4, 5, 6 and 8 years with CHD as outcome for the patient group with diagnosed diabetes for over 10 years

| Calculated risk period (years) | First analysis  |                              |                                 | Second analysis |                              |                                 |
|--------------------------------|-----------------|------------------------------|---------------------------------|-----------------|------------------------------|---------------------------------|
|                                | Cases/ <i>n</i> | <i>c</i> -statistic (95% CI) | $\chi^2$ statistic ( <i>p</i> ) | Cases/ <i>n</i> | <i>c</i> -statistic (95% CI) | $\chi^2$ statistic ( <i>p</i> ) |
| 4                              | 18/415          | 0.65 (0.35–0.94)             | 15.2 ( <i>p</i> =0.347)         | 18/452          | 0.64 (0.34–0.94)             | 18.2 ( <i>p</i> =0.174)         |
| 5                              | 22/410          | 0.63 (0.37–0.89)             | 20.8 ( <i>p</i> =0.098)         | 22/452          | 0.63 (0.37–0.88)             | 25.6 ( <i>p</i> =0.031)         |
| 6                              | 27/401          | 0.63 (0.39–0.86)             | 25.3 ( <i>p</i> =0.018)         | 27/452          | 0.62 (0.39–0.85)             | 32.2 ( <i>p</i> =0.005)         |
| 8                              | 31/292          | 0.63 (0.42–0.84)             | 23.3 ( <i>p</i> =0.028)         | 31/452          | 0.63 (0.42–0.84)             | 55.3 ( <i>p</i> <0.001)         |

First analysis: censored cases excluded

Second analysis: censored cases included
