# Supplementary material for: External validation of the UK Prospective Diabetes Study (UKPDS) risk engine in patients with type 2 diabetes
Source: PubMed Central journal article supplement — Diabetologia. 2010 Nov 14;54(2):264–70. doi: 10.1007/s00125-010-1960-0 (PMC3017299; doi:10.1007/s00125-010-1960-0), 2010-11-14
Supplement: 125_2010_1960_MOESM5_ESM.pdf [file 125_2010_1960_MOESM5_ESM.pdf]

## Electronic supplementary material

**ESM Table 4** Discrimination and calibration of the UKPDS risk engine for calculated risk periods of 4, 5, 6 and 8 years with CVD as outcome for the patient group with diagnosed diabetes for up to 10 years

| Calculated risk period (years) | First analysis  |                              |                                 | Second analysis |                              |                                 |
|--------------------------------|-----------------|------------------------------|---------------------------------|-----------------|------------------------------|---------------------------------|
|                                | Cases/ <i>n</i> | <i>c</i> -statistic (95% CI) | $\chi^2$ statistic ( <i>p</i> ) | Cases/ <i>n</i> | <i>c</i> -statistic (95% CI) | $\chi^2$ statistic ( <i>p</i> ) |
| 4                              | 46/1,094        | 0.66 (0.50–0.82)             | 16.0 ( <i>p</i> =0.232)         | 46/1,170        | 0.65 (0.49–0.81)             | 20.3 ( <i>p</i> =0.065)         |
| 5                              | 51/1,068        | 0.67 (0.52–0.82)             | 24.0 ( <i>p</i> =0.026)         | 51/1,170        | 0.66 (0.51–0.81)             | 32.1 ( <i>p</i> =0.002)         |
| 6                              | 60/1,040        | 0.67 (0.53–0.80)             | 29.6 ( <i>p</i> =0.005)         | 60/1,170        | 0.66 (0.52–0.80)             | 43.0 ( <i>p</i> <0.001)         |
| 8                              | 81/807          | 0.65 (0.53–0.78)             | 22.1 ( <i>p</i> =0.009)         | 81/1,170        | 0.64 (0.52–0.76)             | 70.3 ( <i>p</i> <0.001)         |

First analysis: censored cases excluded

Second analysis: censored cases included
