# Supplementary material for: External validation of the UK Prospective Diabetes Study (UKPDS) risk engine in patients with type 2 diabetes
Source: PubMed Central journal article supplement — Diabetologia. 2010 Nov 14;54(2):264–70. doi: 10.1007/s00125-010-1960-0 (PMC3017299; doi:10.1007/s00125-010-1960-0), 2010-11-14
Supplement: 125_2010_1960_MOESM6_ESM.pdf [file 125_2010_1960_MOESM6_ESM.pdf]

## Electronic supplementary material

**ESM Table 5** Discrimination and calibration of the UKPDS risk engine for calculated risk periods of 4, 5, 6 and 8 years with CVD as outcome for the patient group with diagnosed diabetes for over 10 years

| Calculated risk period (years) | First analysis  |                              |                                       | Second analysis |                              |                                       |
|--------------------------------|-----------------|------------------------------|---------------------------------------|-----------------|------------------------------|---------------------------------------|
|                                | Cases/ <i>n</i> | <i>c</i> -statistic (95% CI) | $\chi^2$ statistic ( <i>p</i> =0.456) | Cases/ <i>n</i> | <i>c</i> -statistic (95% CI) | $\chi^2$ statistic ( <i>p</i> <0.001) |
| 4                              | 21/416          | 0.66 (0.39–0.93)             | 13.0 ( <i>p</i> =0.456)               | 21/452          | 0.66 (0.39–0.93)             | 15.5 ( <i>p</i> =0.290)               |
| 5                              | 27/411          | 0.63 (0.40–0.87)             | 16.6 ( <i>p</i> =0.260)               | 27/452          | 0.63 (0.39–0.86)             | 20.3 ( <i>p</i> =0.083)               |
| 6                              | 34/402          | 0.63 (0.42–0.84)             | 19.3 ( <i>p</i> =0.049)               | 34/452          | 0.62 (0.41–0.83)             | 25.0 ( <i>p</i> =0.023)               |
| 8                              | 41/293          | 0.63 (0.45–0.82)             | 15.1 ( <i>p</i> =0.395)               | 41/452          | 0.64 (0.46–0.82)             | 39.8 ( <i>p</i> <0.001)               |

First analysis: censored cases excluded

Second analysis: censored cases included
